# Supplementary material for: Efficacy and safety of Epimedium total flavonoids for primary osteoporosis: a systematic review and meta-analysis
Source: Front Pharmacol. 2024 Nov 18;15:1505926. doi: 10.3389/fphar.2024.1505926 (PMC11608984; doi:10.3389/fphar.2024.1505926)
Supplement: Supplementary file 1 [file Table2.XLSX]

## Sheet: data
权限	类型	检索式	数据库	检索结果	运行日期
- WOS.IC: 1993 to 2024 - WOS.CCR: 1985 to 2024 - WOS.SCI: 2008 to 2024	检索	Epimedium (主题) OR Epimedium (所有字段) OR Epimedium grandiflorum (所有字段) OR Epimedium sagittatum (所有字段)	Web of Science 核心合集	1108	Sun Aug 11 2024 16:16:46 GMT+0800 (中国标准时间)
- WOS.IC: 1993 to 2024 - WOS.CCR: 1985 to 2024 - WOS.SCI: 2008 to 2024	检索	Flavonoid (主题) OR Flavonoid (所有字段) OR Bioflavonoid (所有字段)	Web of Science 核心合集	110522	Sun Aug 11 2024 16:18:41 GMT+0800 (中国标准时间)
- WOS.IC: 1993 to 2024 - WOS.CCR: 1985 to 2024 - WOS.SCI: 2008 to 2024	检索	#2 AND #1	Web of Science 核心合集	440	Sun Aug 11 2024 16:19:13 GMT+0800 (中国标准时间)
- WOS.IC: 1993 to 2024 - WOS.CCR: 1985 to 2024 - WOS.SCI: 2008 to 2024	检索	Epimedium total flavonoid (所有字段) OR Epimedium flavonoid (所有字段)	Web of Science 核心合集	440	Sun Aug 11 2024 16:22:21 GMT+0800 (中国标准时间)
- WOS.IC: 1993 to 2024 - WOS.CCR: 1985 to 2024 - WOS.SCI: 2008 to 2024	检索	#4 OR #3	Web of Science 核心合集	440	Sun Aug 11 2024 16:22:58 GMT+0800 (中国标准时间)
- WOS.IC: 1993 to 2024 - WOS.CCR: 1985 to 2024 - WOS.SCI: 2008 to 2024	检索	Osteoporosis, Postmenopausal (主题) OR Post-Menopausal Osteoporoses (所有字段) OR Post-Menopausal Osteoporosis (所有字段) OR Postmenopausal Osteoporosis (所有字段) OR Postmenopausal Osteoporoses (所有字段) OR Perimenopausal Bone Loss (所有字段) OR Postmenopausal Bone Loss (所有字段) OR Osteoporosis, Postmenopausal (所有字段) OR Osteoporosis (主题) OR Age-Related Osteoporosis (所有字段) OR Age-Related Osteoporoses (所有字段) OR Age Rela…	Web of Science 核心合集	93815	Sun Aug 11 2024 16:28:42 GMT+0800 (中国标准时间)
- WOS.IC: 1993 to 2024 - WOS.CCR: 1985 to 2024 - WOS.SCI: 2008 to 2024	检索	#6 AND #5	Web of Science 核心合集	84	Sun Aug 11 2024 16:29:13 GMT+0800 (中国标准时间)
- WOS.IC: 1993 to 2024 - WOS.CCR: 1985 to 2024 - WOS.SCI: 2008 to 2024	文献	Chen et al. A novel small molecule effectively ameliorates estrogen deficiency-induced osteoporosis by targeting the gut-bone signaling axis	Web of Science 核心合集	1	Sun Aug 11 2024 16:33:12 GMT+0800 (中国标准时间)
- WOS.IC: 1993 to 2024 - WOS.CCR: 1985 to 2024 - WOS.SCI: 2008 to 2024	文献	Karimi et al. Plant-derived natural medicines for the management of osteoporosis: A comprehensive review of clinical trials *	Web of Science 核心合集	1	Sun Aug 11 2024 16:43:08 GMT+0800 (中国标准时间)
